# Supplementary figures and images for: X-Ray diffraction spectrometric analysis of nickel refinery aerosols, process materials and particulates isolated from worker lung tissuesElectronic supplementary information (ESI) available: Figs S1–S7 showing X-ray diffraction patterns of lung tissue residue, air samples, historical anode slime sample and historical sample from the copper cementation process. See http://www.rsc.org/suppdata/em/b2/b212809h/Presented at the 6th International Nickel Conference, Murmansk, Kola Peninsula, Russia, September 1-6, 2002.
Source: Royal Society of Chemistry journal article supplement (doi:10.1039/b212809h), 2003-03-12

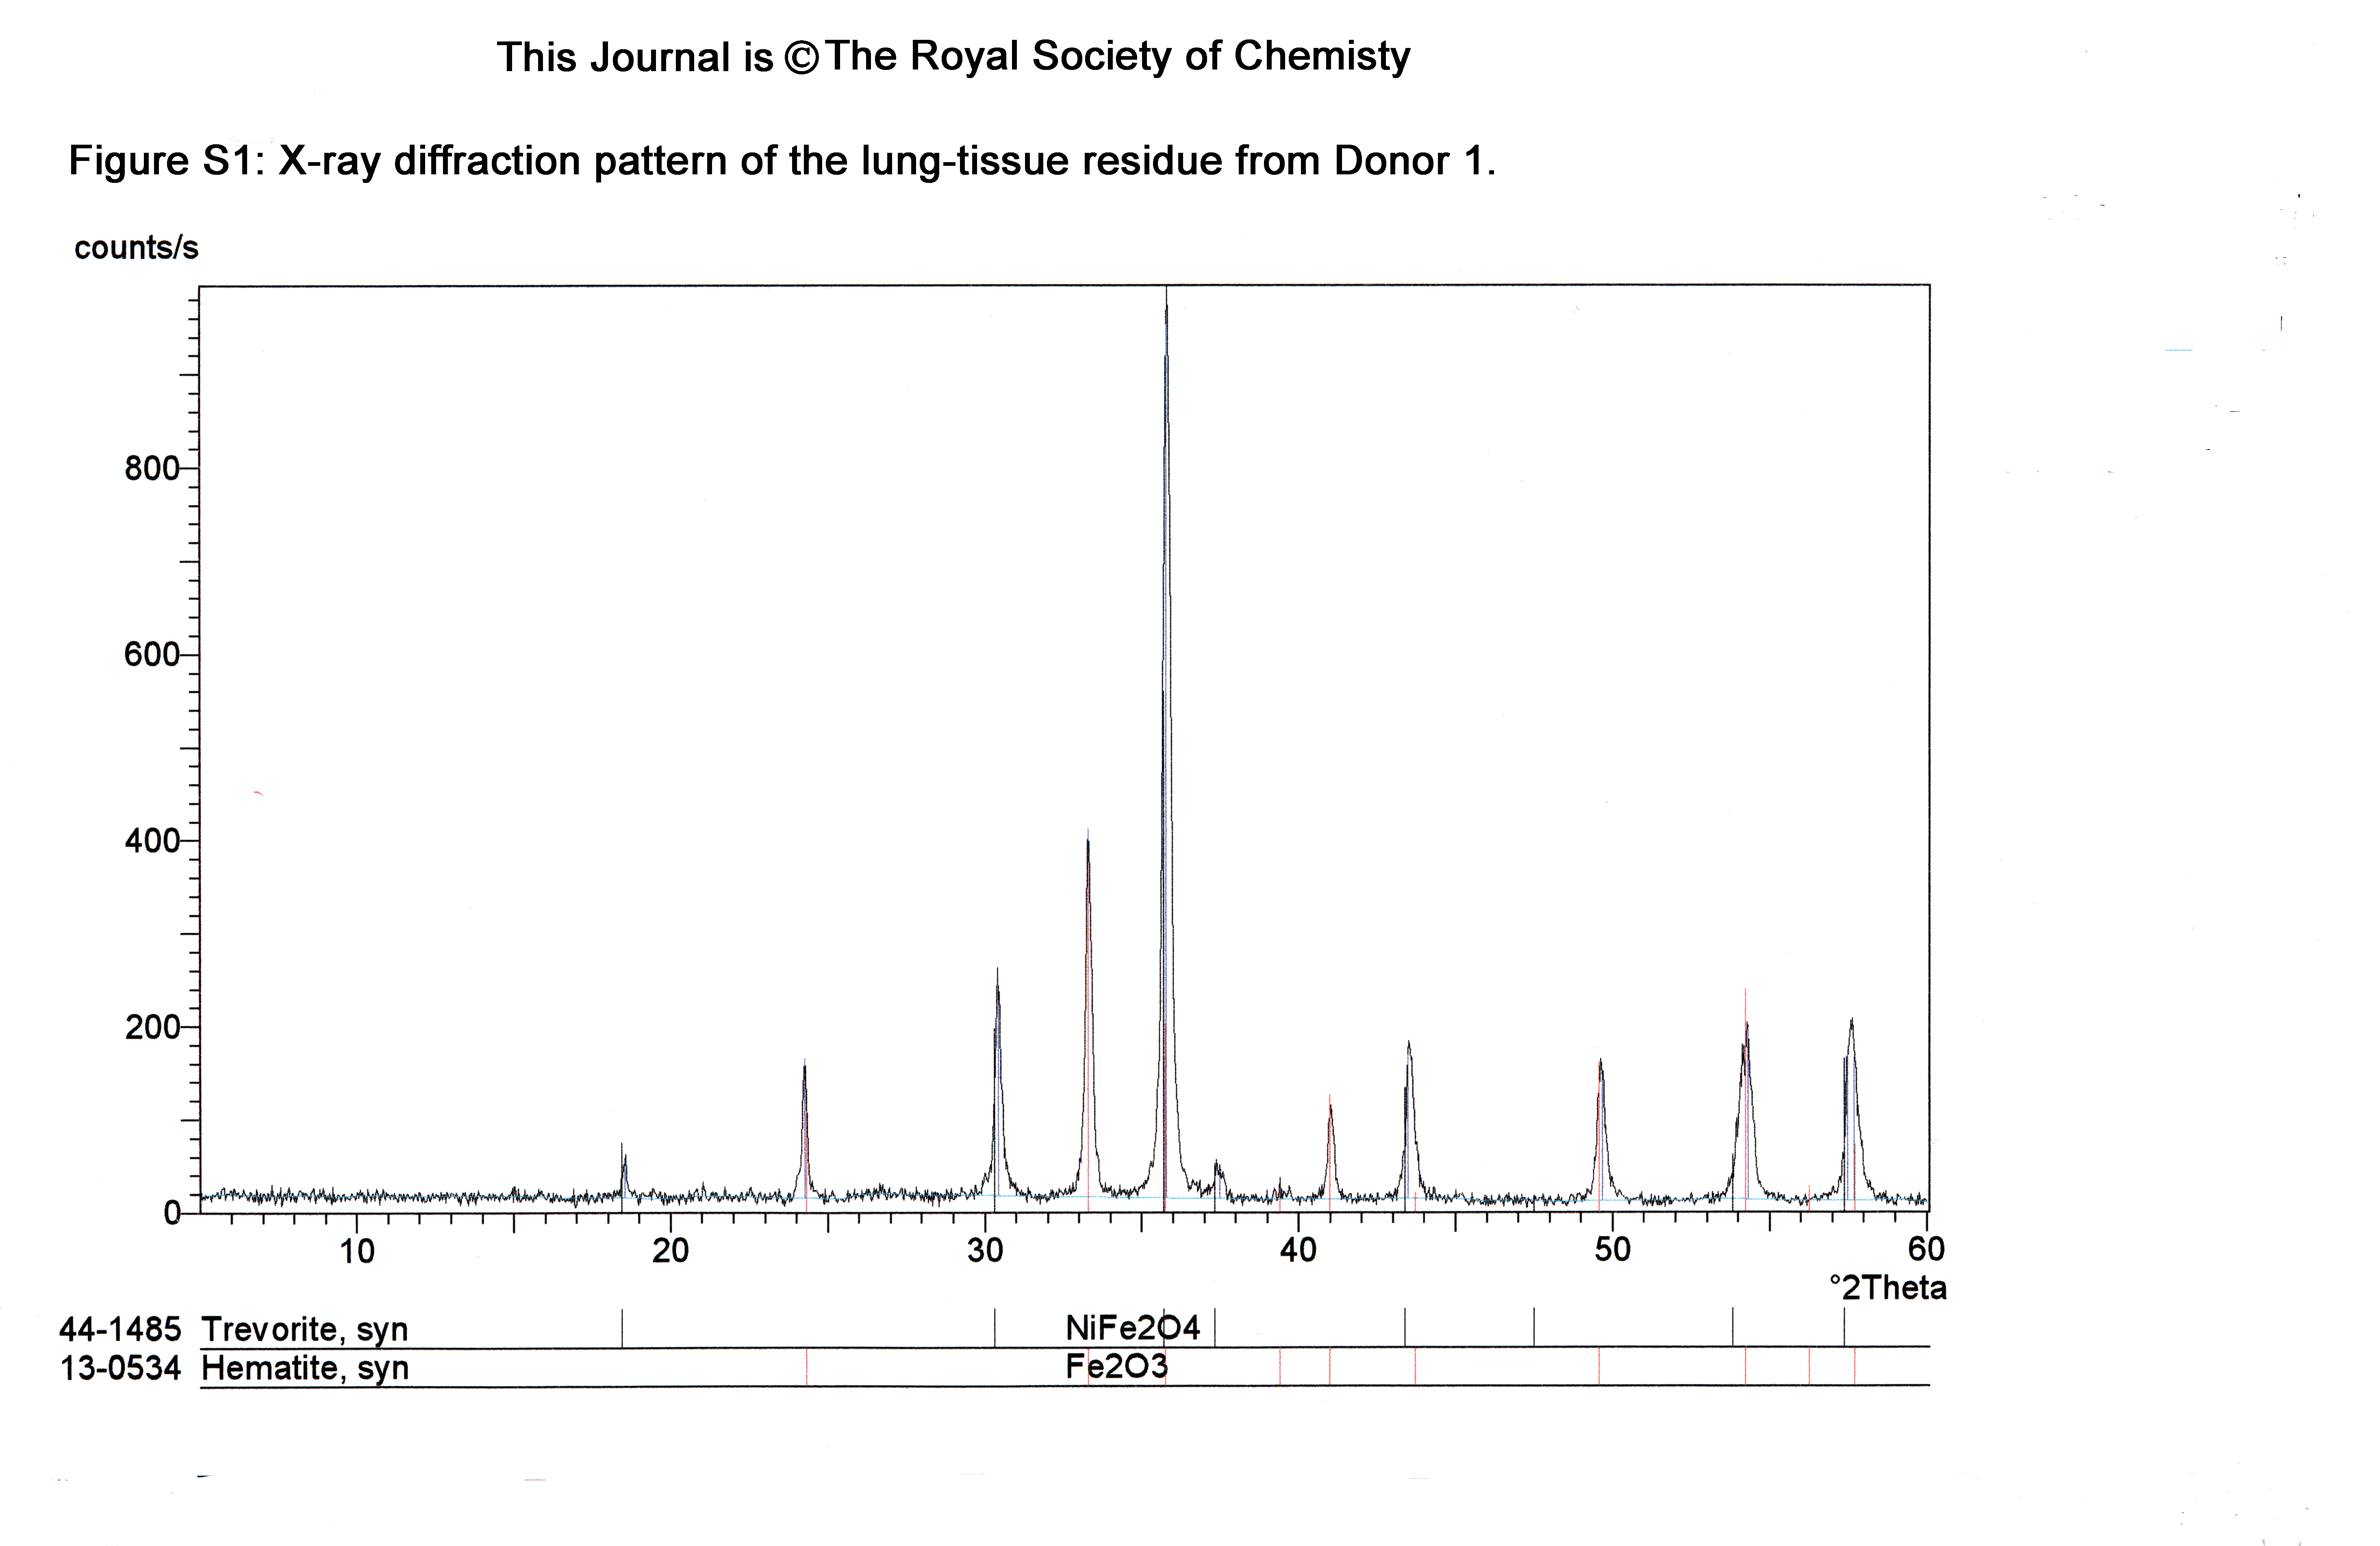

Supplement: figs1.doc [file figs1.doc]

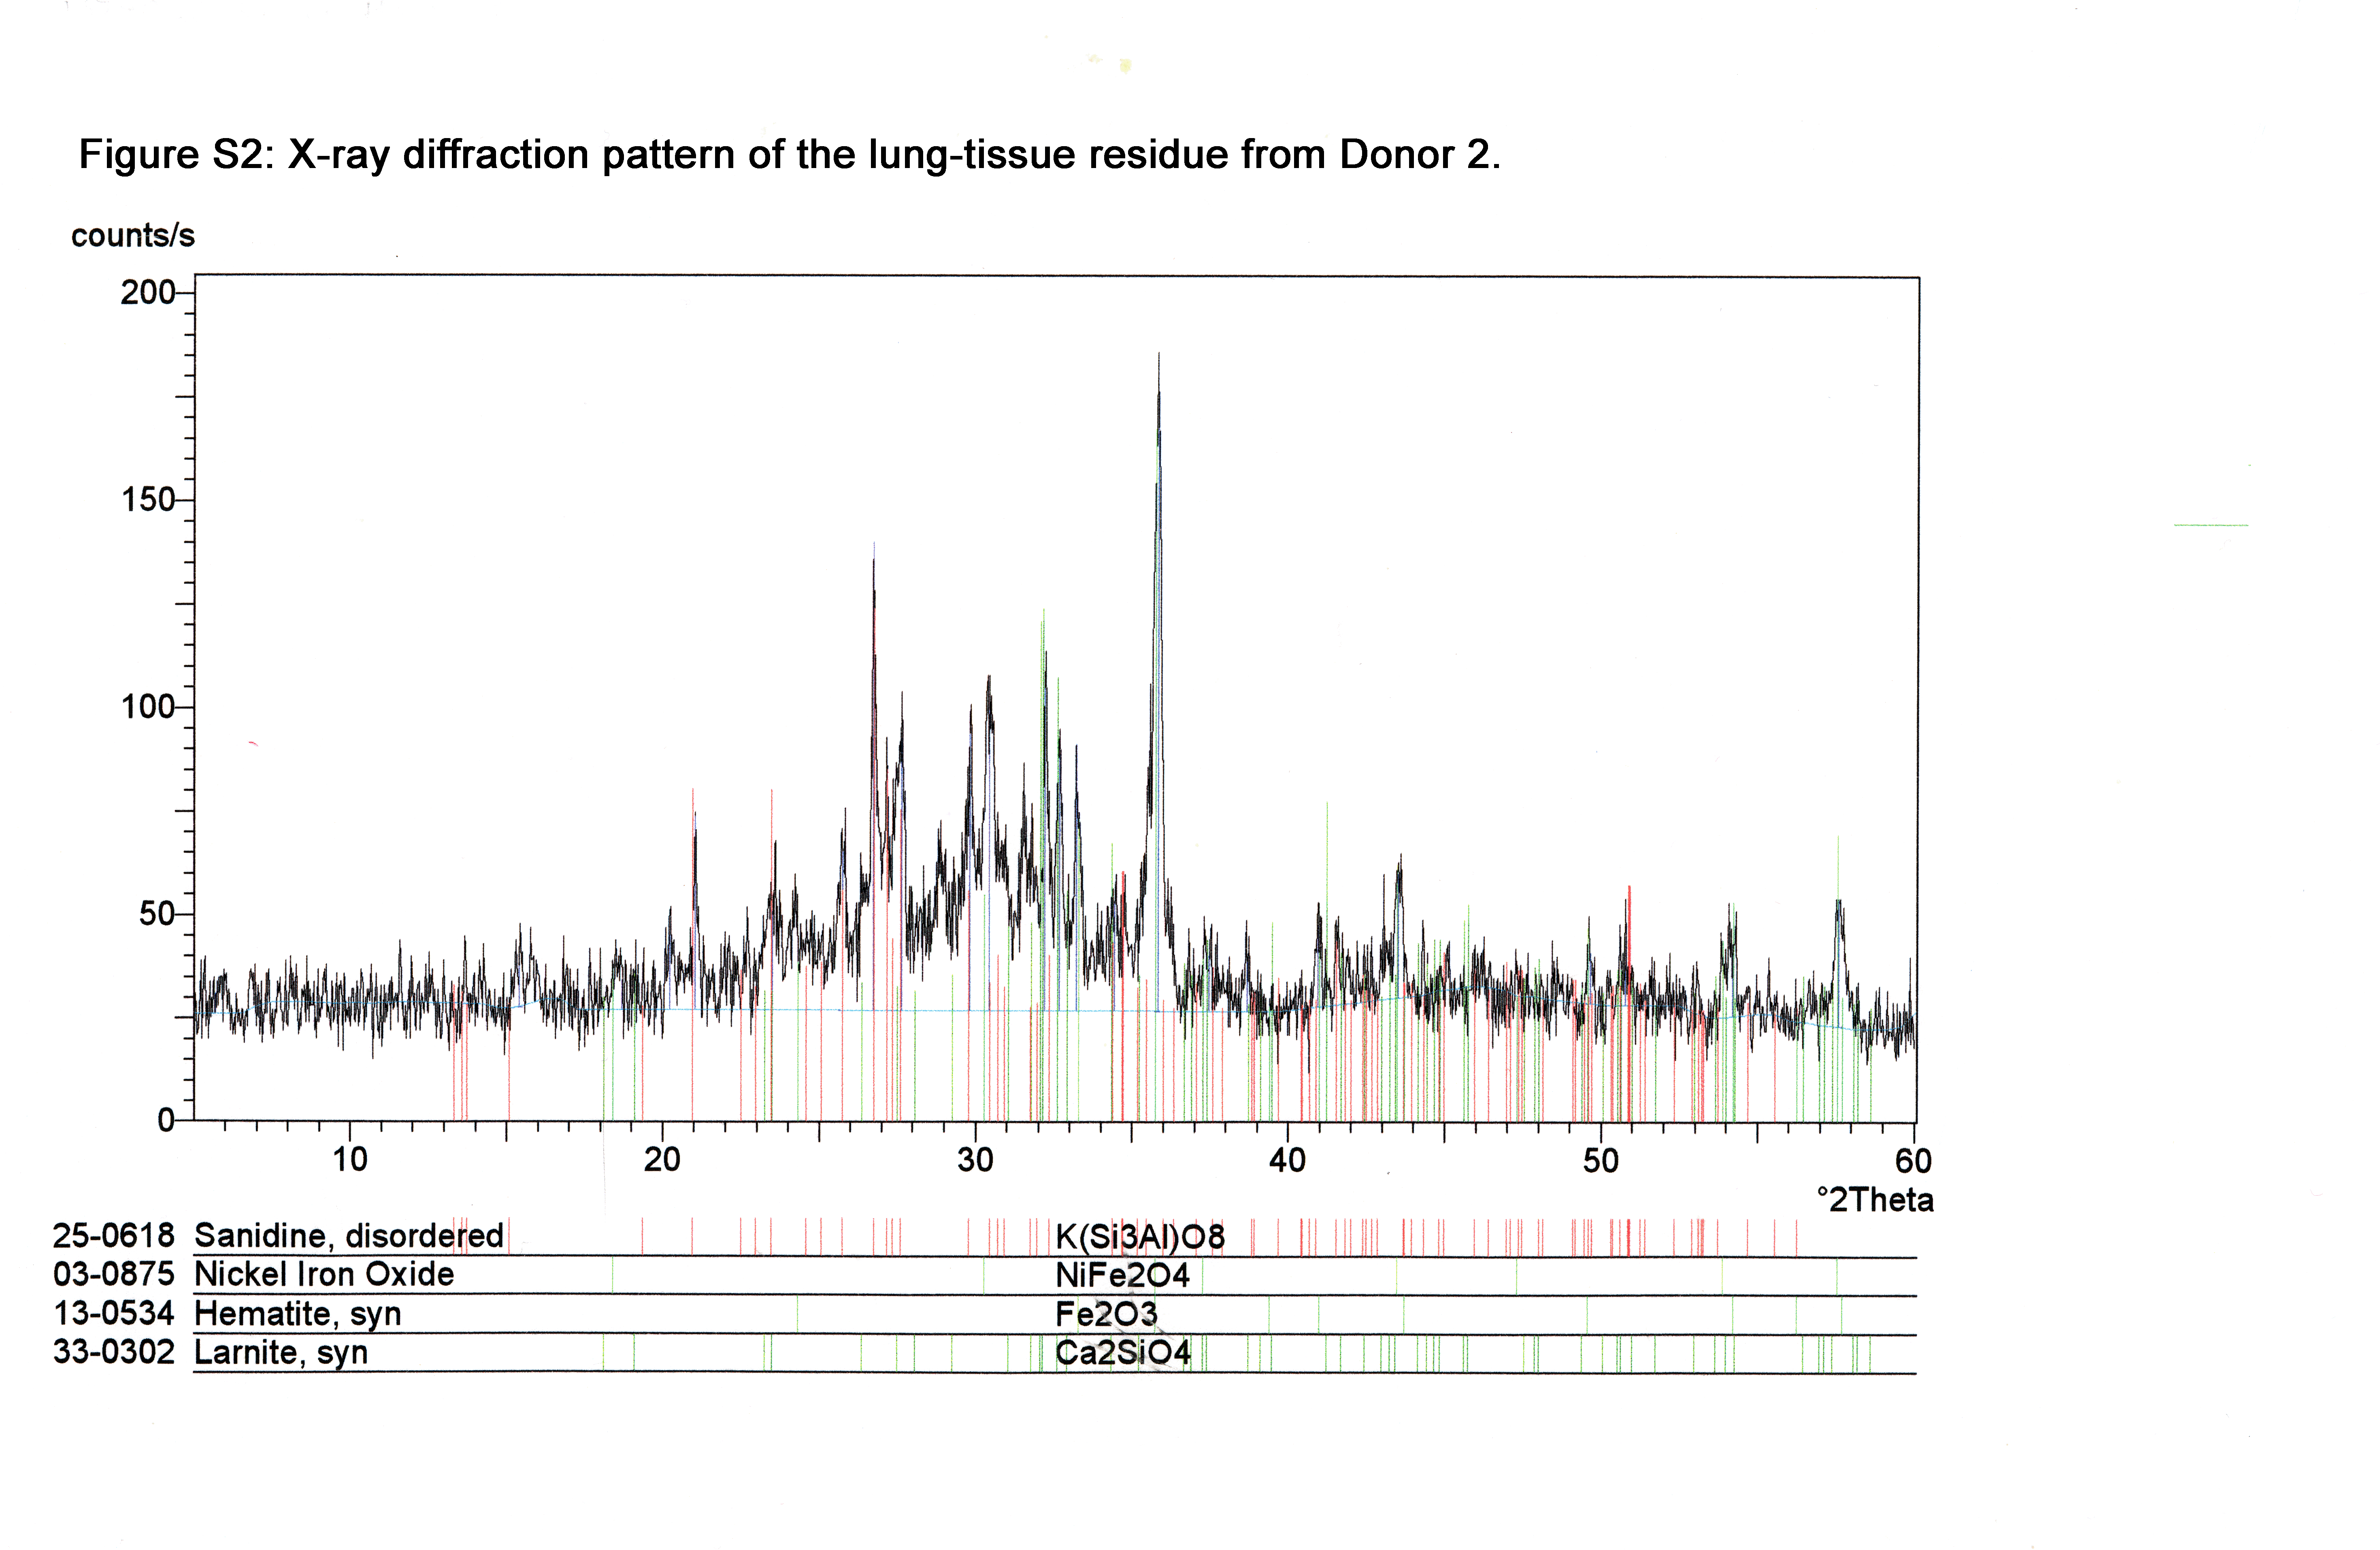

Supplement: figs2.doc [file figs2.doc]

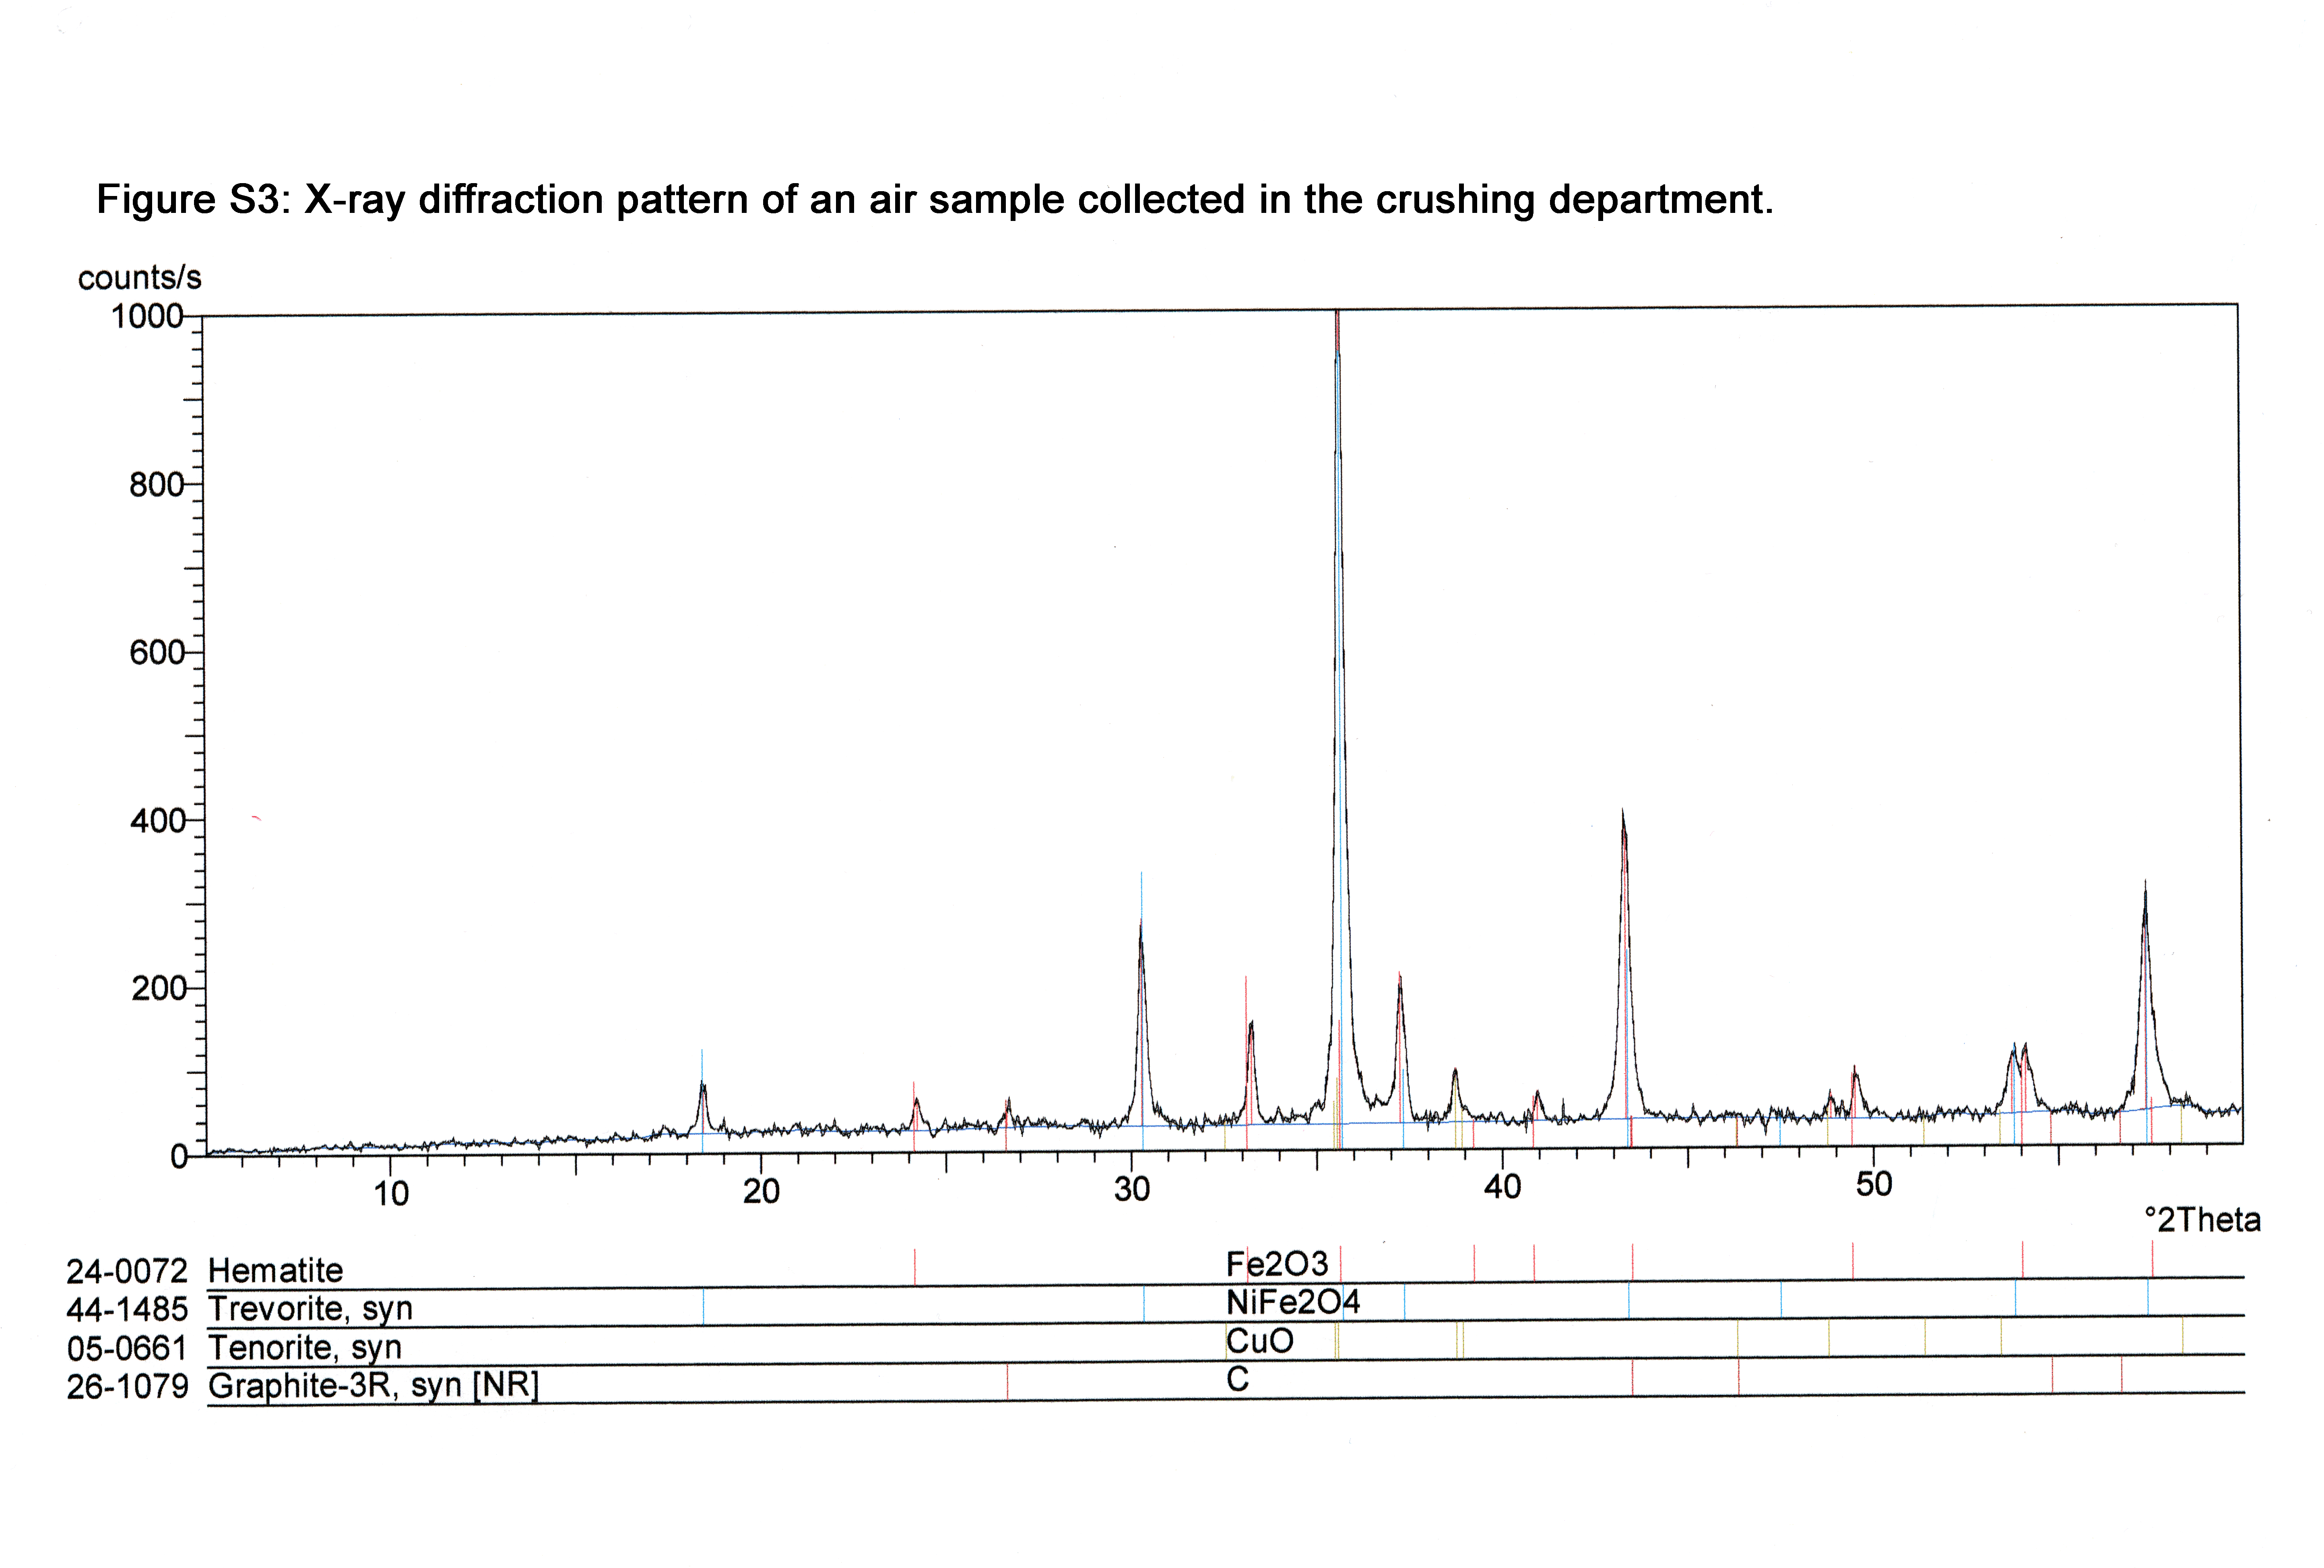

Supplement: figs3.doc [file figs3.doc]

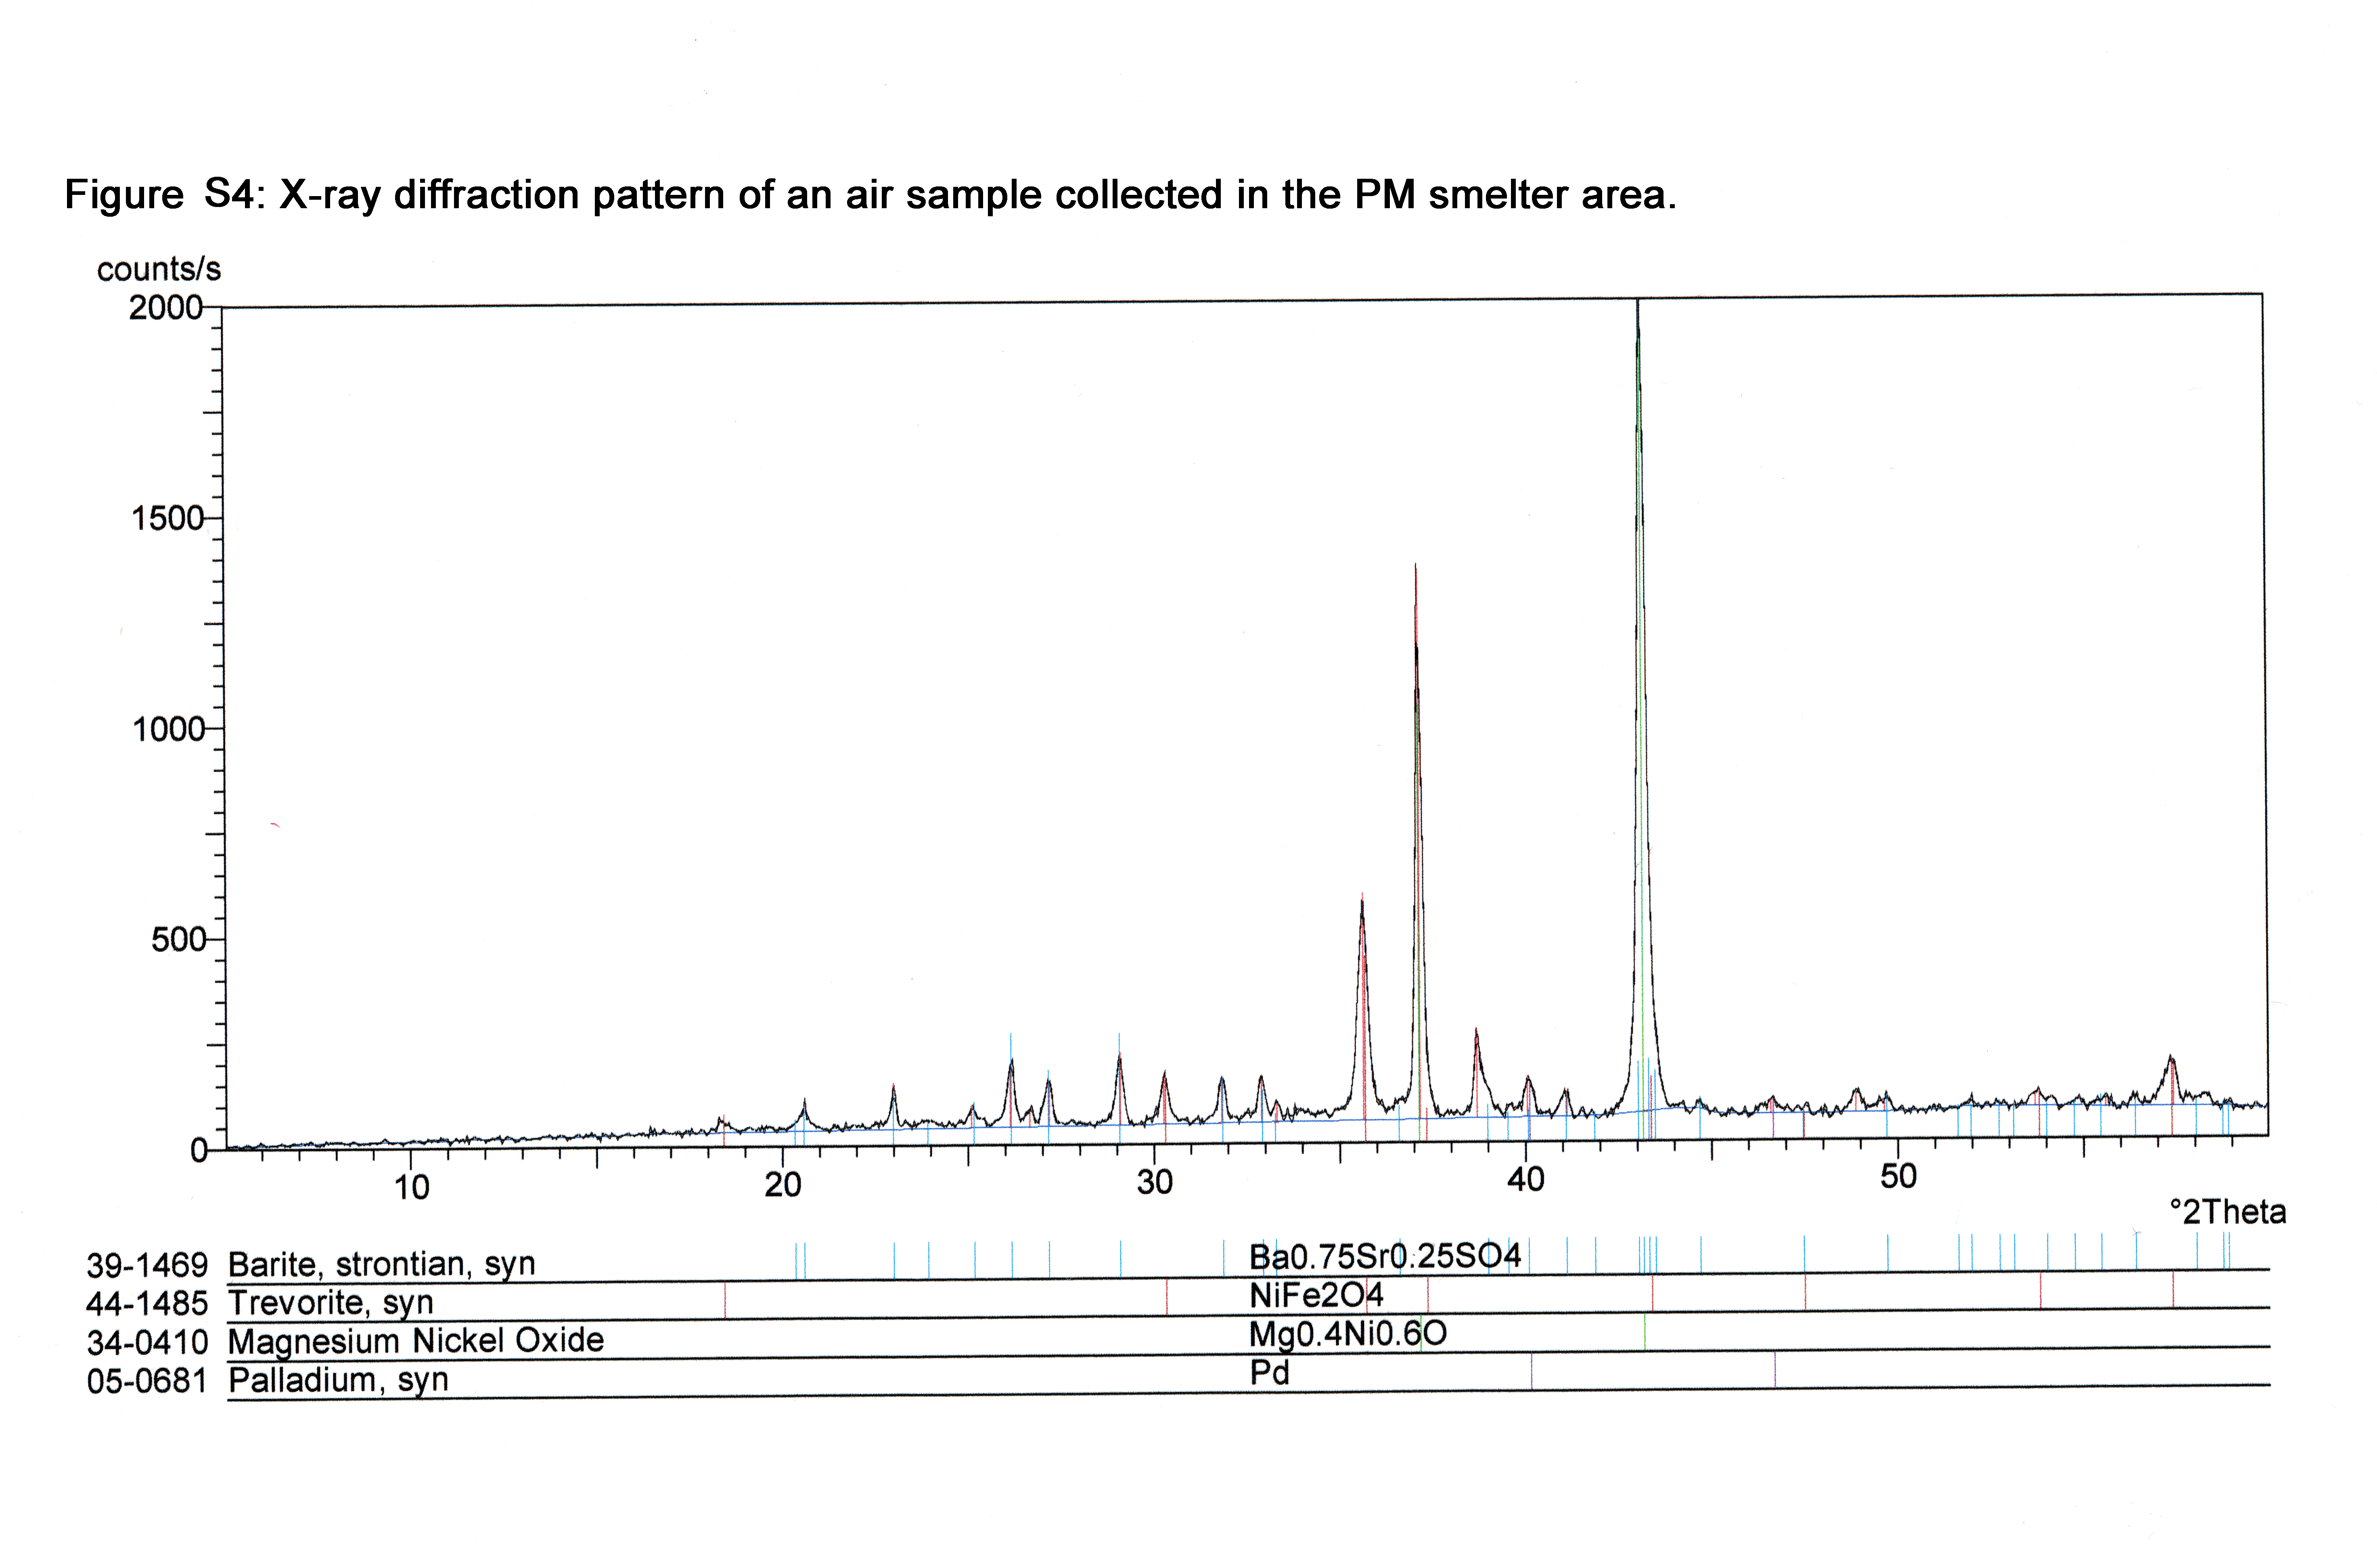

Supplement: figs4.doc [file figs4.doc]

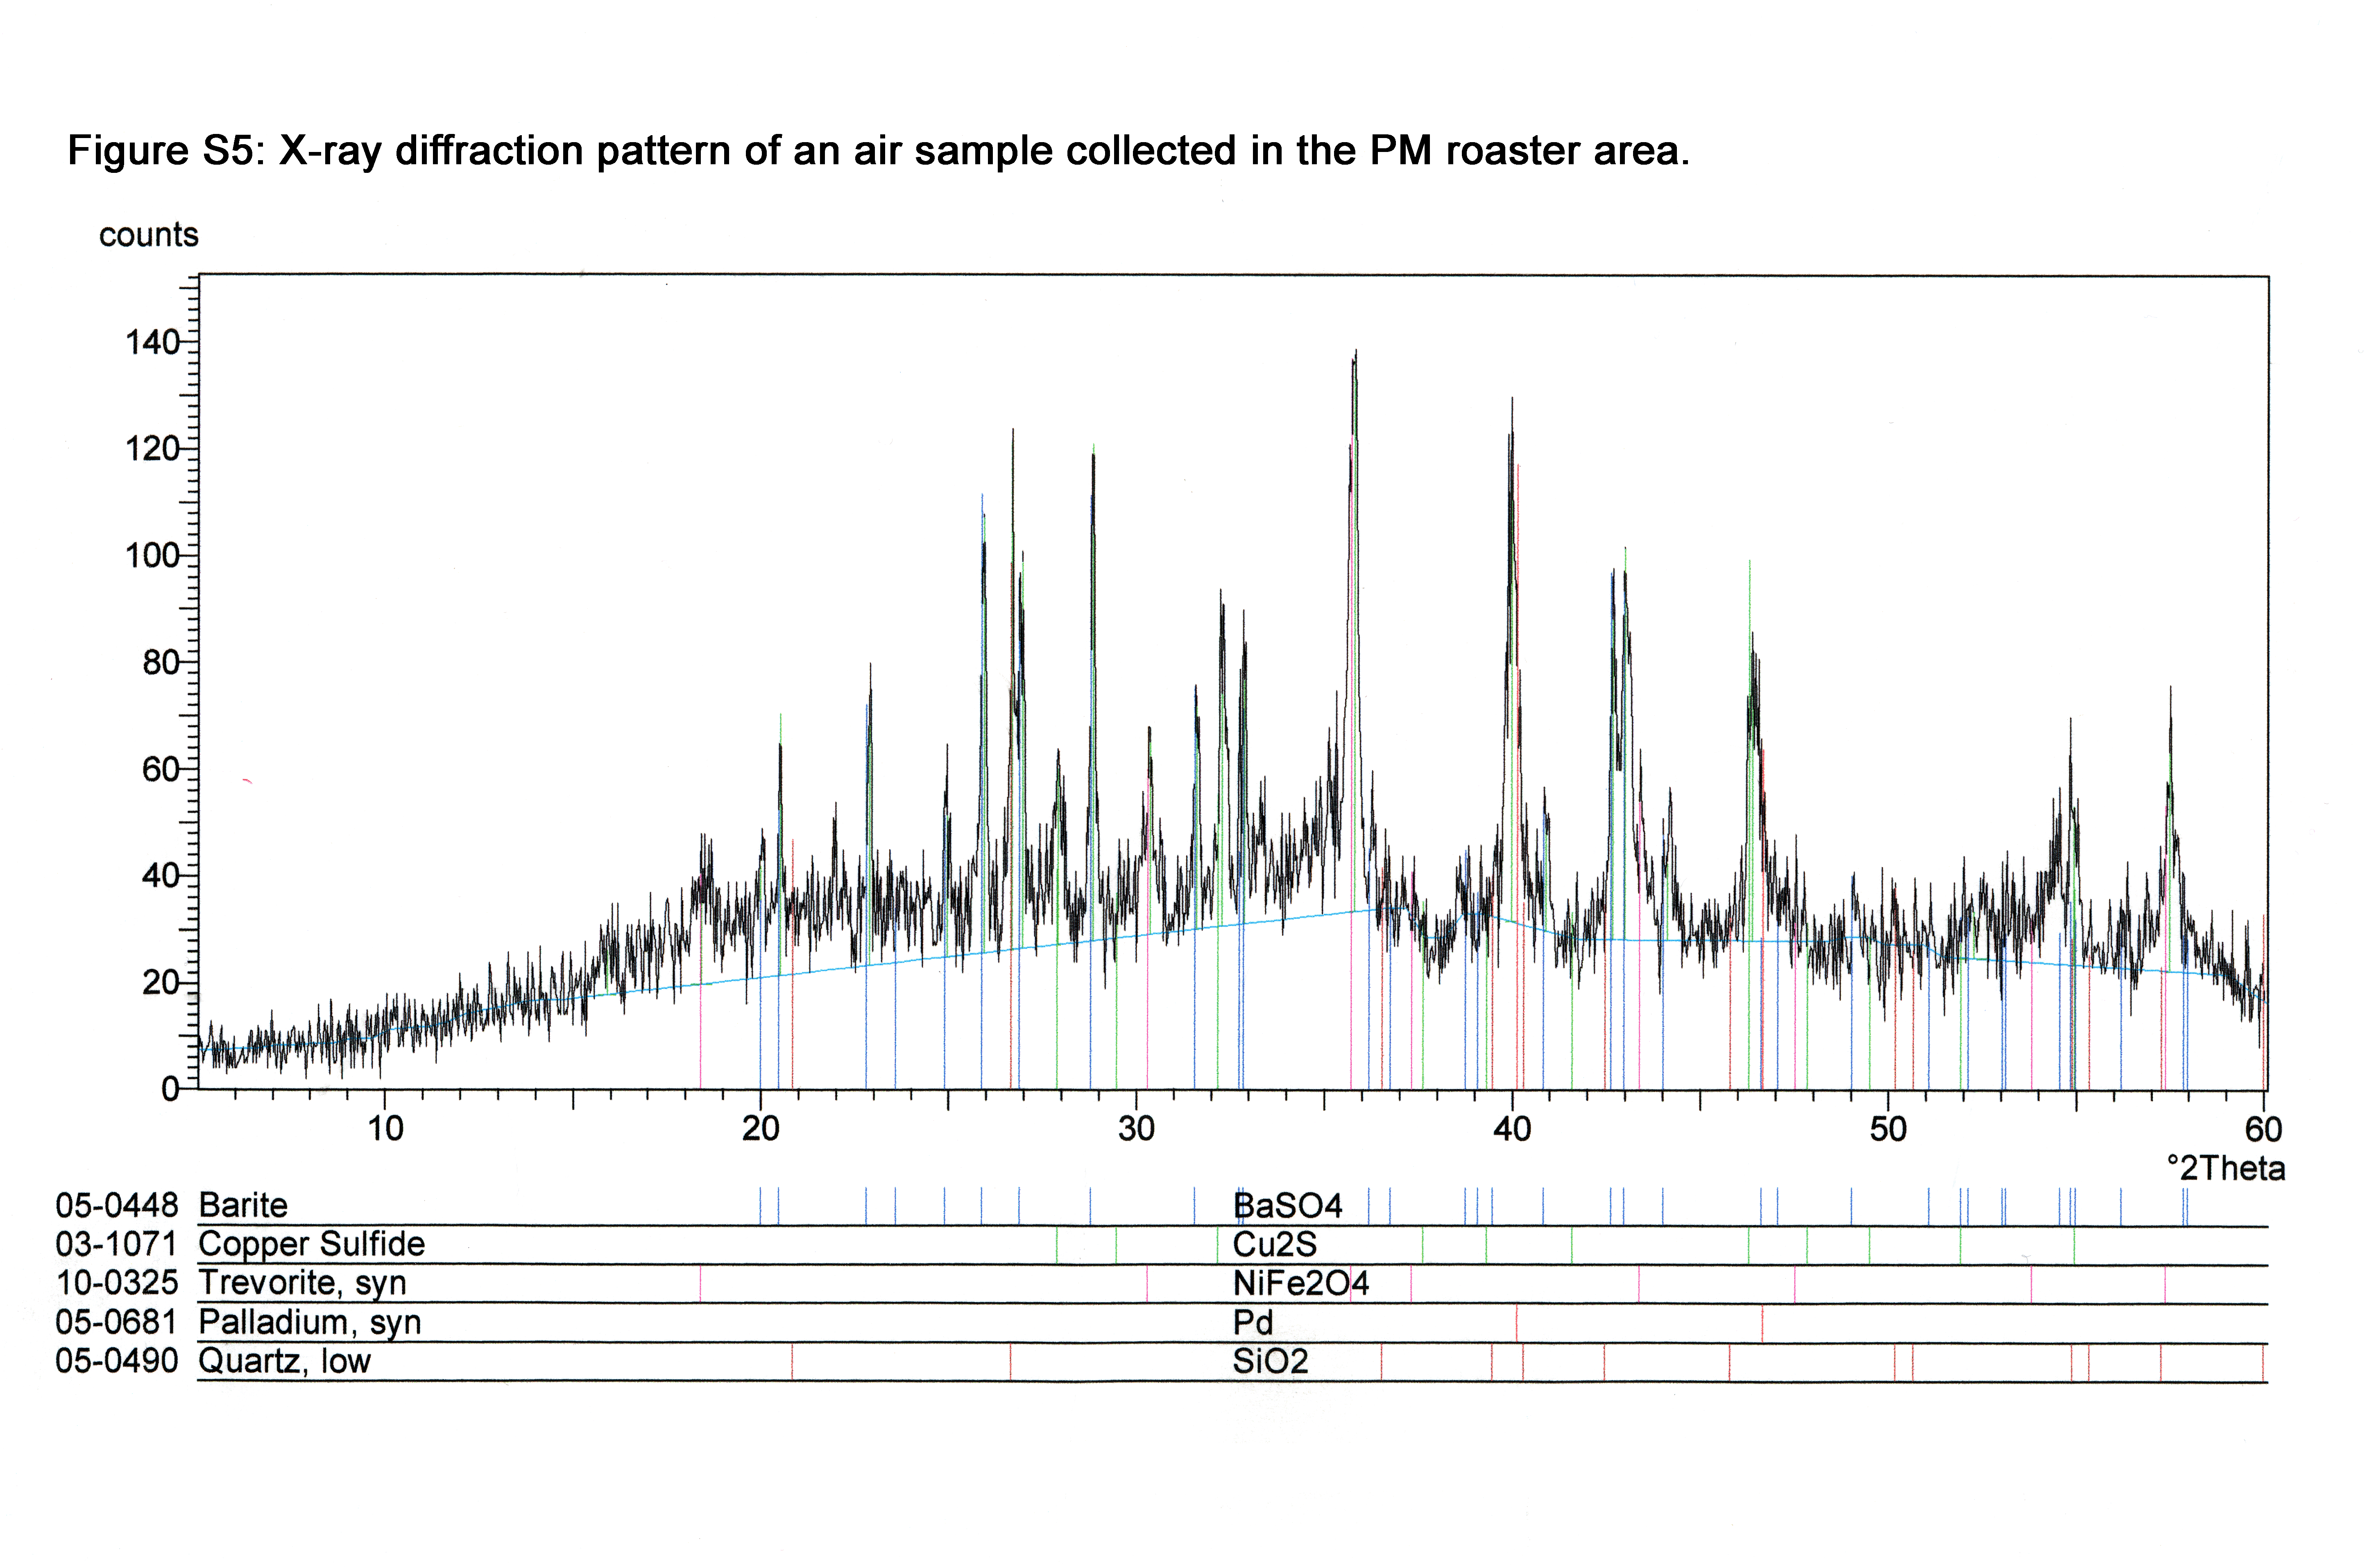

Supplement: figs5.doc [file figs5.doc]

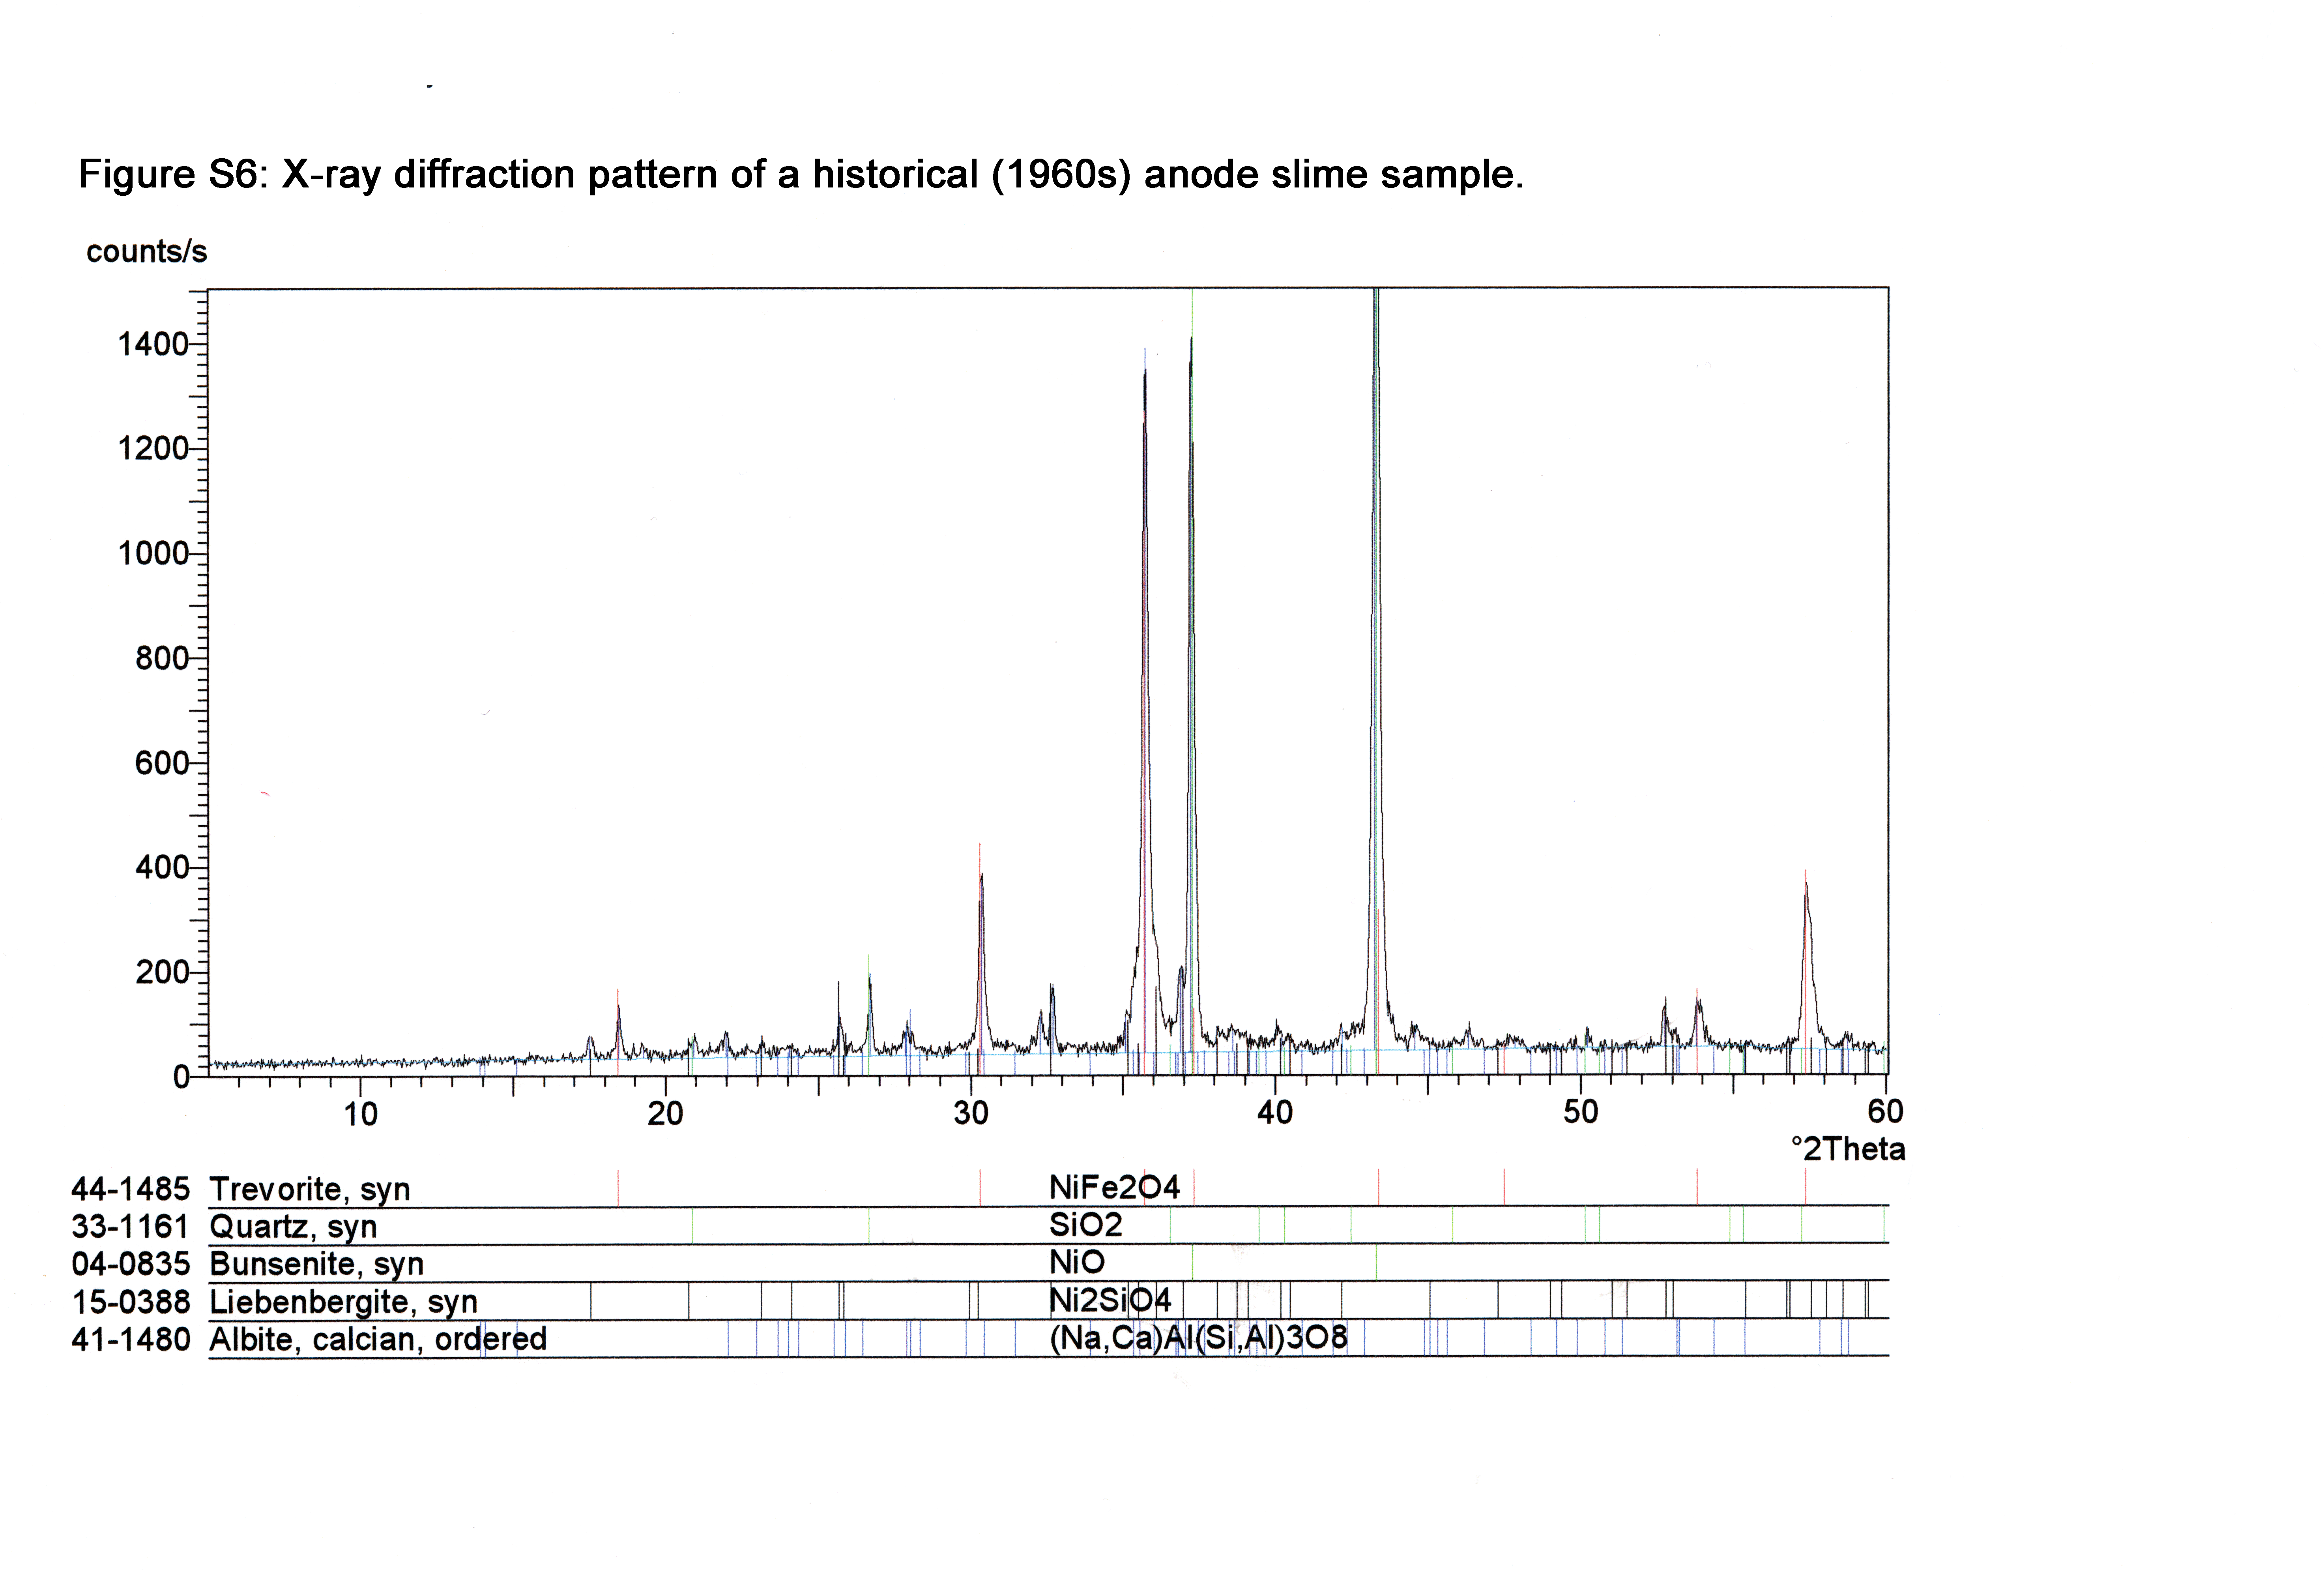

Supplement: figs6.doc [file figs6.doc]

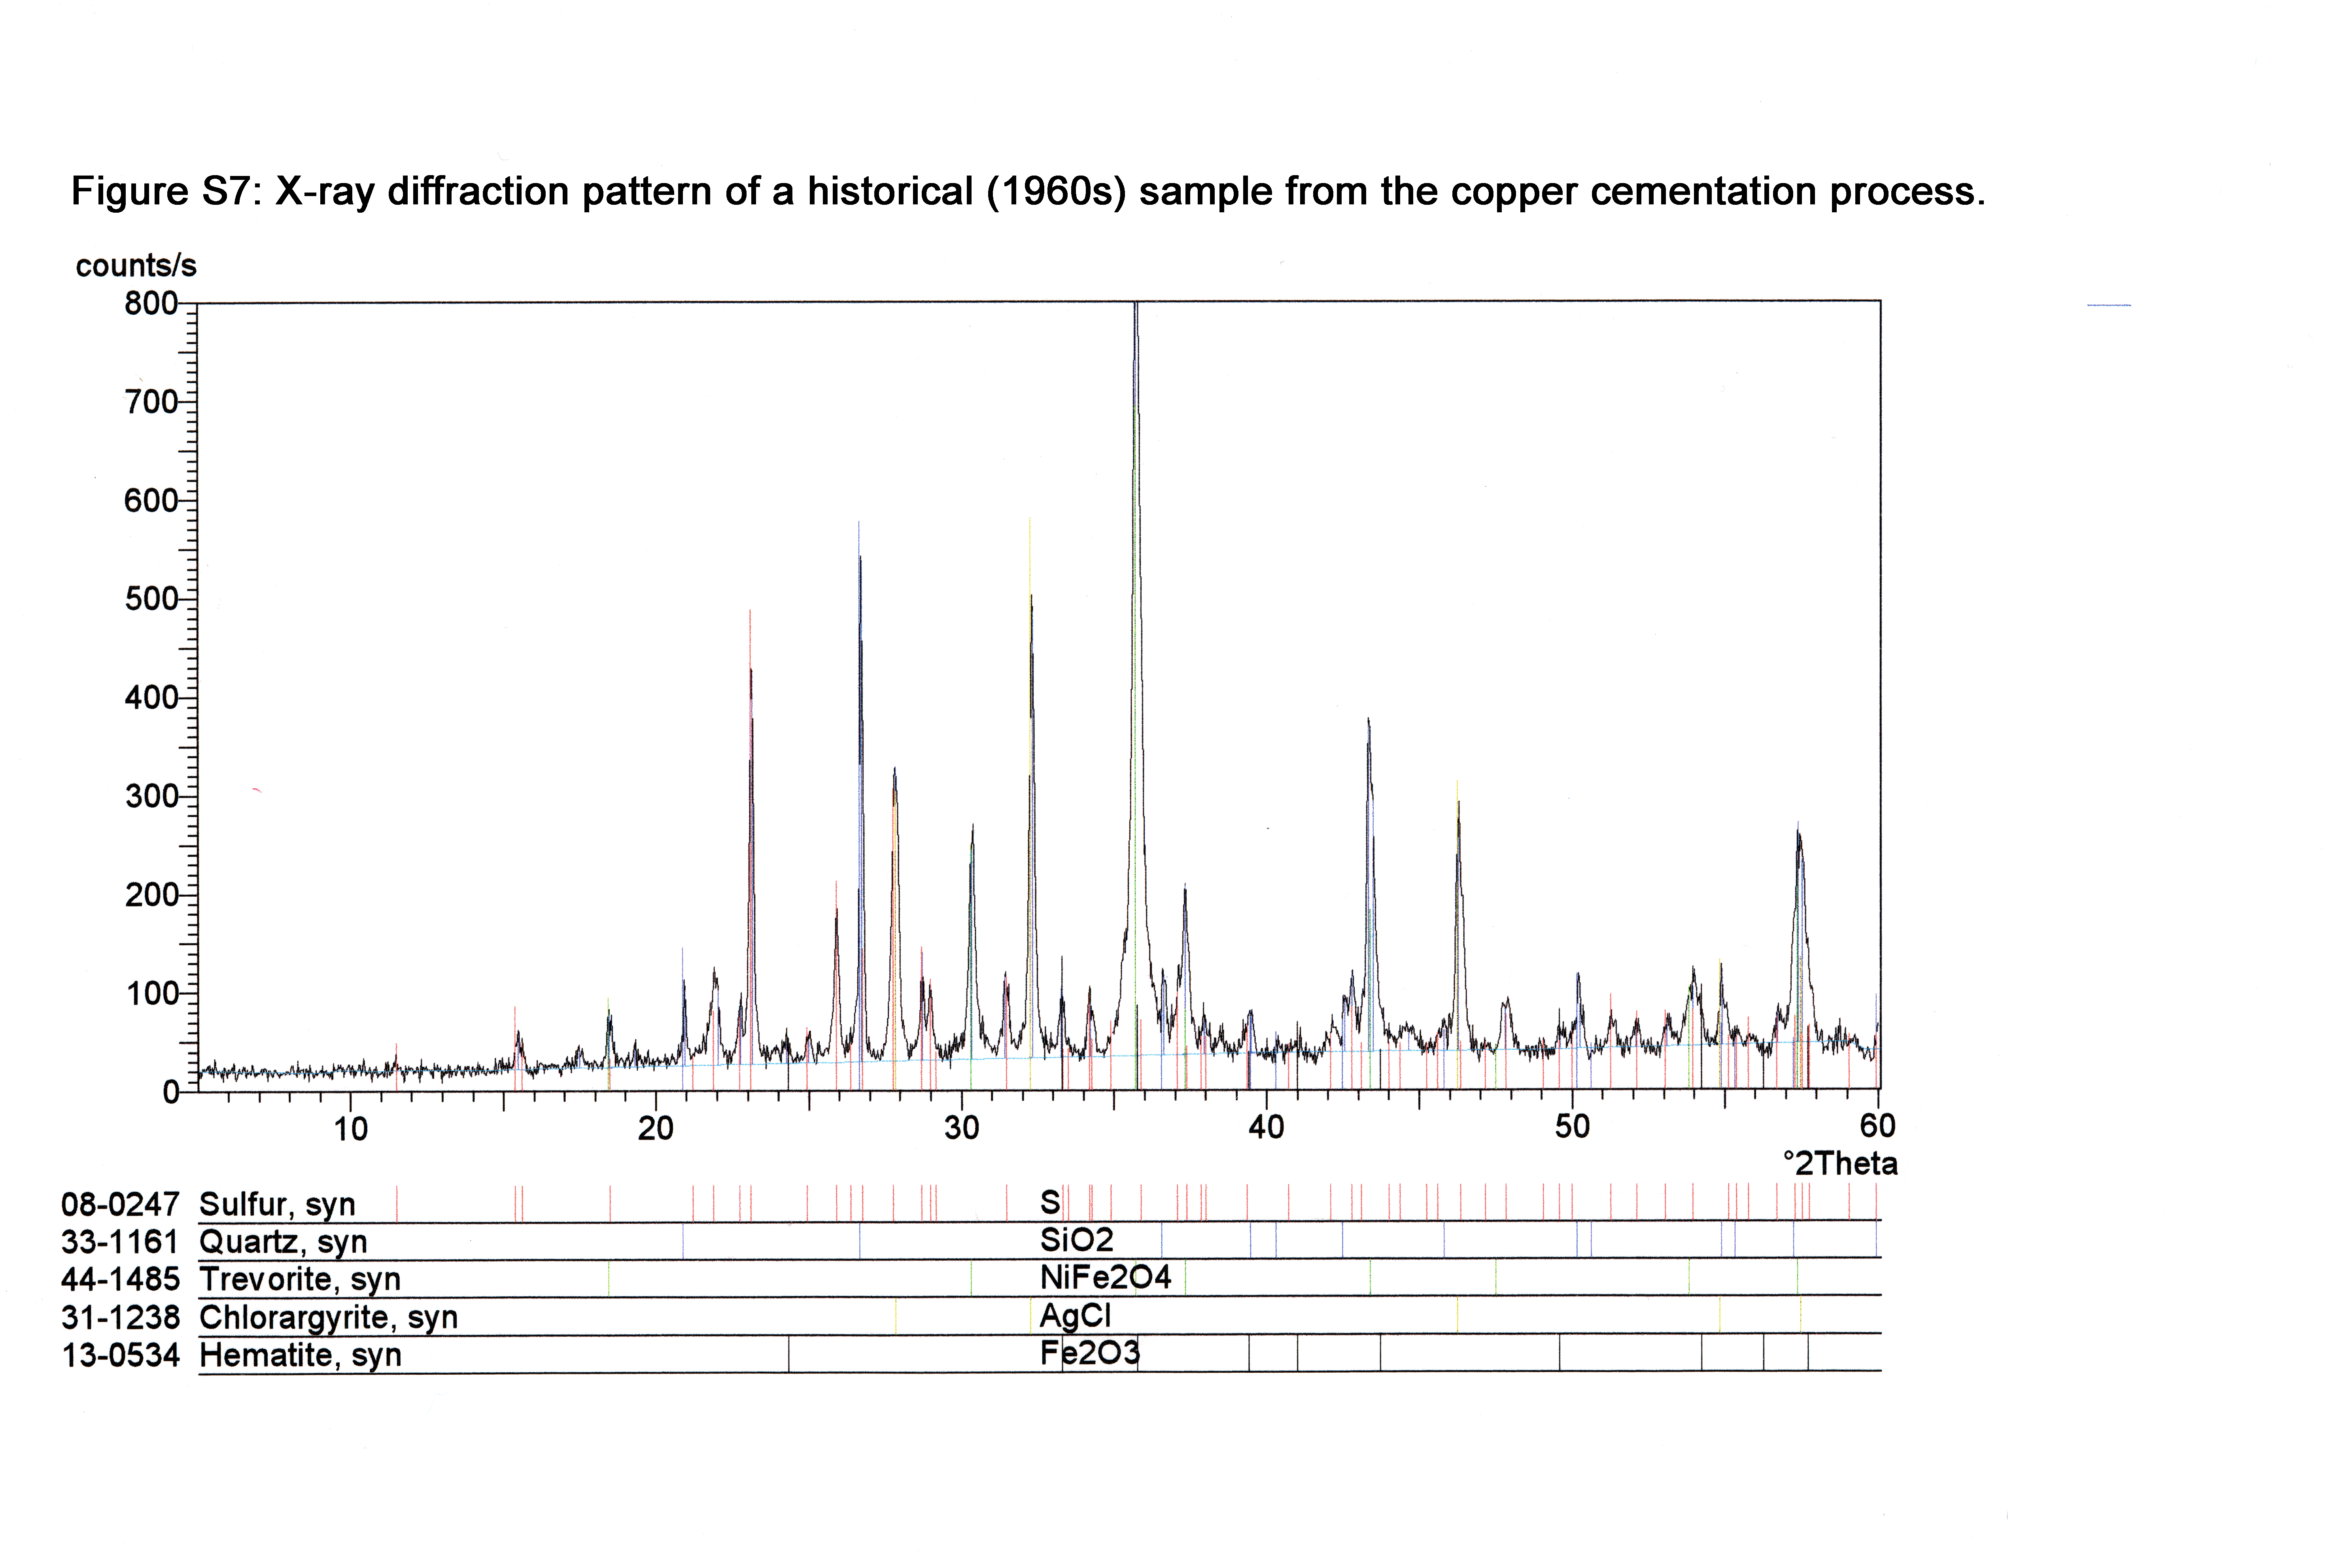

Supplement: figs7.doc [file figs7.doc]
